# Supplementary material
Source: Springer Nature journal article supplement (https://www.springermedizin.de/resource/supplementary/13054_2012_620_MOESM2_ESM.pdf/9708856)

**a**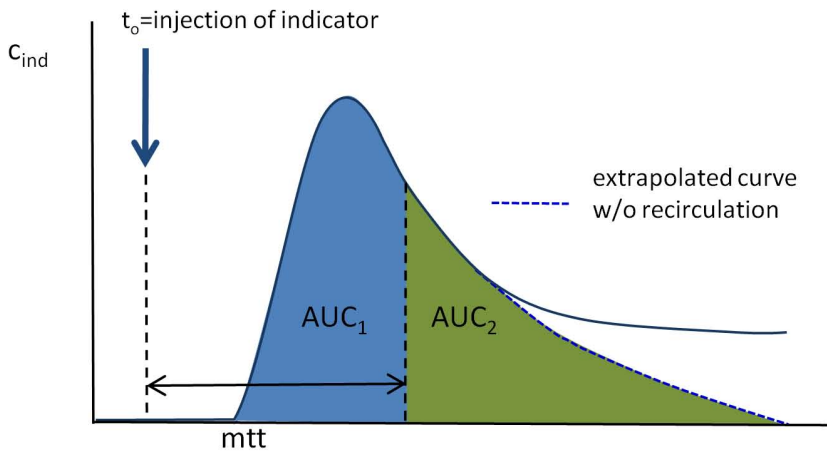**b**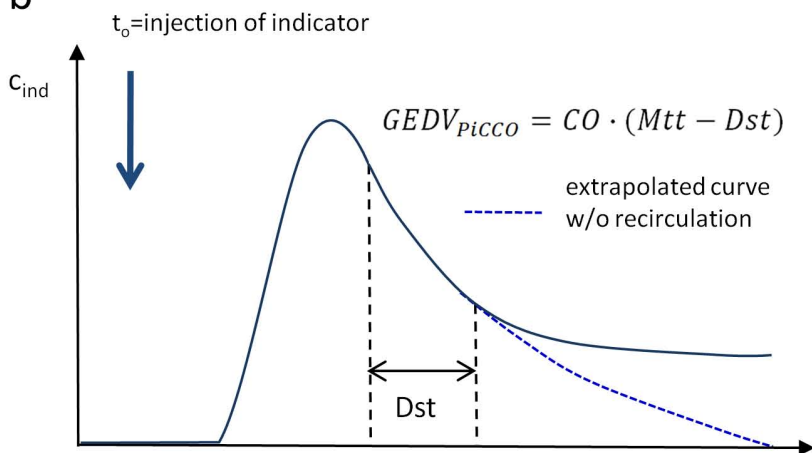**c**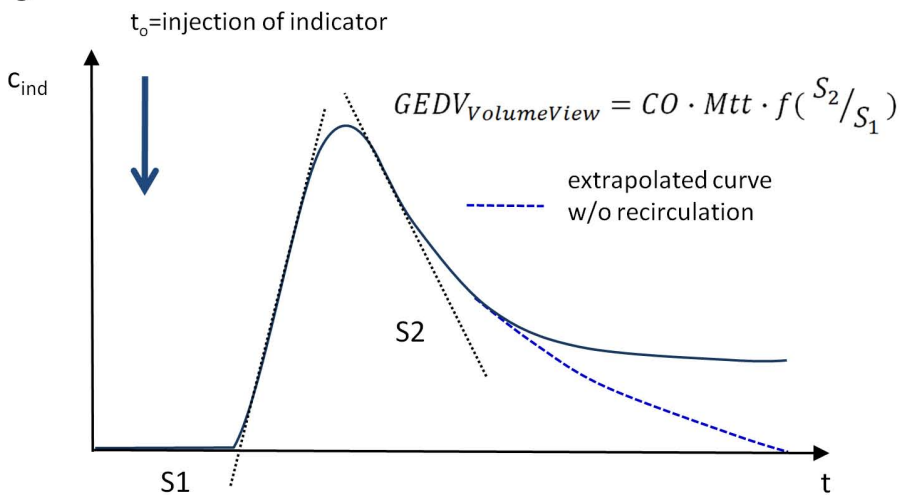

Supplement: MOESM2 [file 9708856]
